# Supplementary material for: Land inclination controls CO 2 and N 2 O fluxes, but not CH 4 uptake, in a temperate upland forest soil
Source: Copernicus journal article supplement (doi:10.5194/soil-9-517-2023), 2023-09-19
Supplement: Supplementary file 1 [file soil-9-517-2023-supplement.pdf]

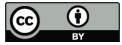

*Supplement of*

## **Land inclination controls CO<sub>2</sub> and N<sub>2</sub>O fluxes, but not CH<sub>4</sub> uptake, in a temperate upland forest soil**

**Lauren M. Gillespie et al.**

*Correspondence to:* Lauren M. Gillespie ([lauren.gillespie@boku.ac.at](mailto:lauren.gillespie@boku.ac.at))

The copyright of individual parts of the supplement might differ from the article licence.

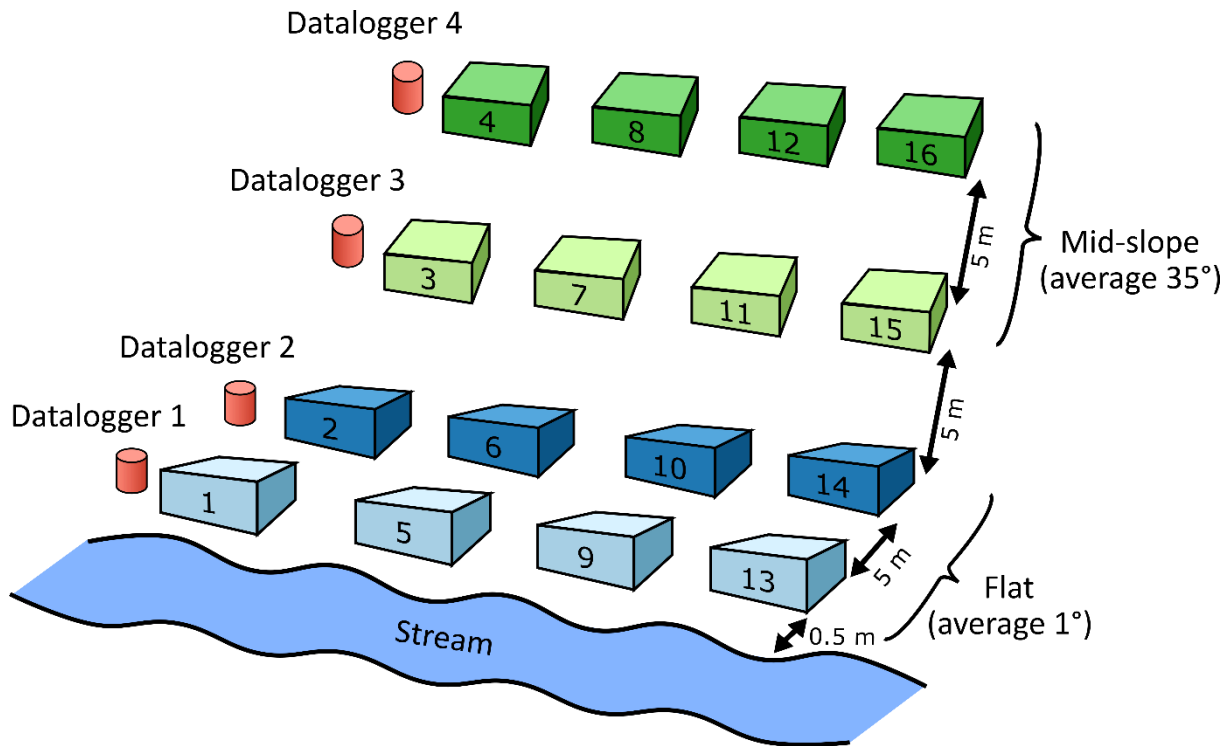

17

18 **Figure S1:** Schematic overview of the experimental setup at Rosalia, with 4x4 replicates at 0.5  
 19 m (chambers 1, 5, 9, and 13), termed Chamber Group 0.5 (CG0.5); 5 m (chambers 2, 6, 10, and  
 20 14), termed Chamber Group 5 (CG5); 10 m (chambers 3, 7, 11, and 15), termed Chamber Group  
 21 10 (CG10); and 15 m (chambers 4, 8, 12, and 16), termed Chamber Group 15 (CG15) away  
 22 from the stream. Datalogger 1 was placed at the stream, followed by dataloggers 2, 3, and 4 at  
 23 distances 5 m, 10 m, and 15 m from the stream, respectively. Chambers 3 and 4 the showed an  
 24 inclination of 31°, chambers 7 and 8 of 34°, chambers 11 and 12 of 35°, and chambers 15 and  
 25 16 of 36°. For the flat chambers, the slope did not exceed 2°.

26

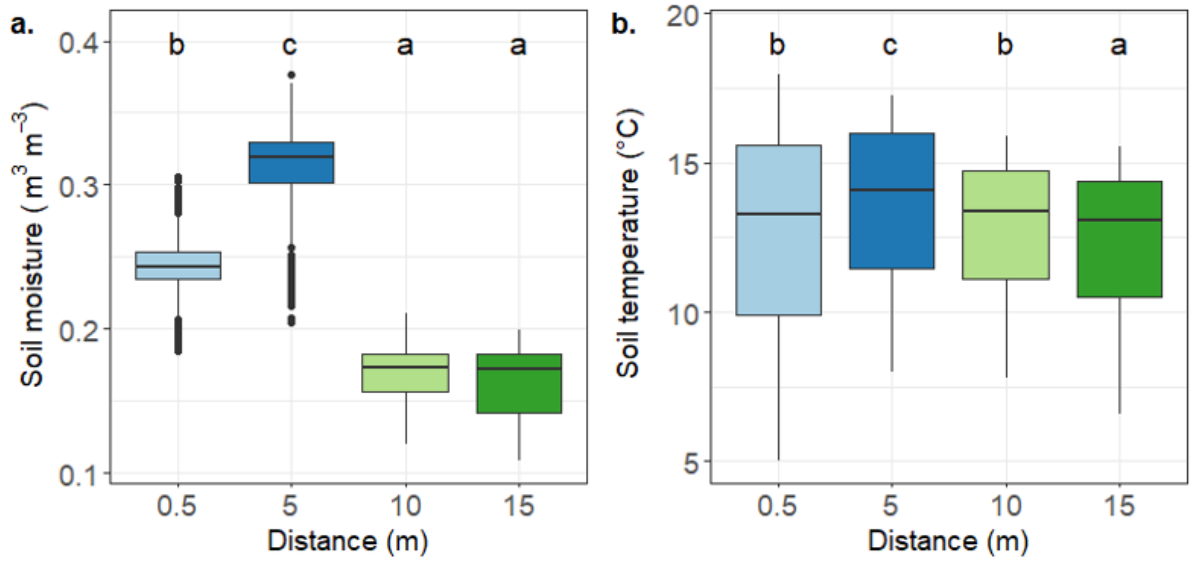

27

28 **Figure S2:** Boxplots of soil moisture ( $\text{m}^3 \text{m}^{-3}$ ) and soil temperature ( $^{\circ}\text{C}$ ) at the different  
 29 distances (m) from the stream, with flat locations 0.5 m and 5 m away from the stream indicated  
 30 in light and dark blue, and sloped locations 10 m and 15 m away from the stream indicated in  
 31 light and dark green. Letters indicate differences between distances (Dunn multiple comparison  
 32 test after Kruskal–Wallis test,  $p < 0.05$ ; Kruskal–Wallis results were significant, i.e.,  $p < 0.05$ ,  
 33 for both soil moisture and soil temperature).

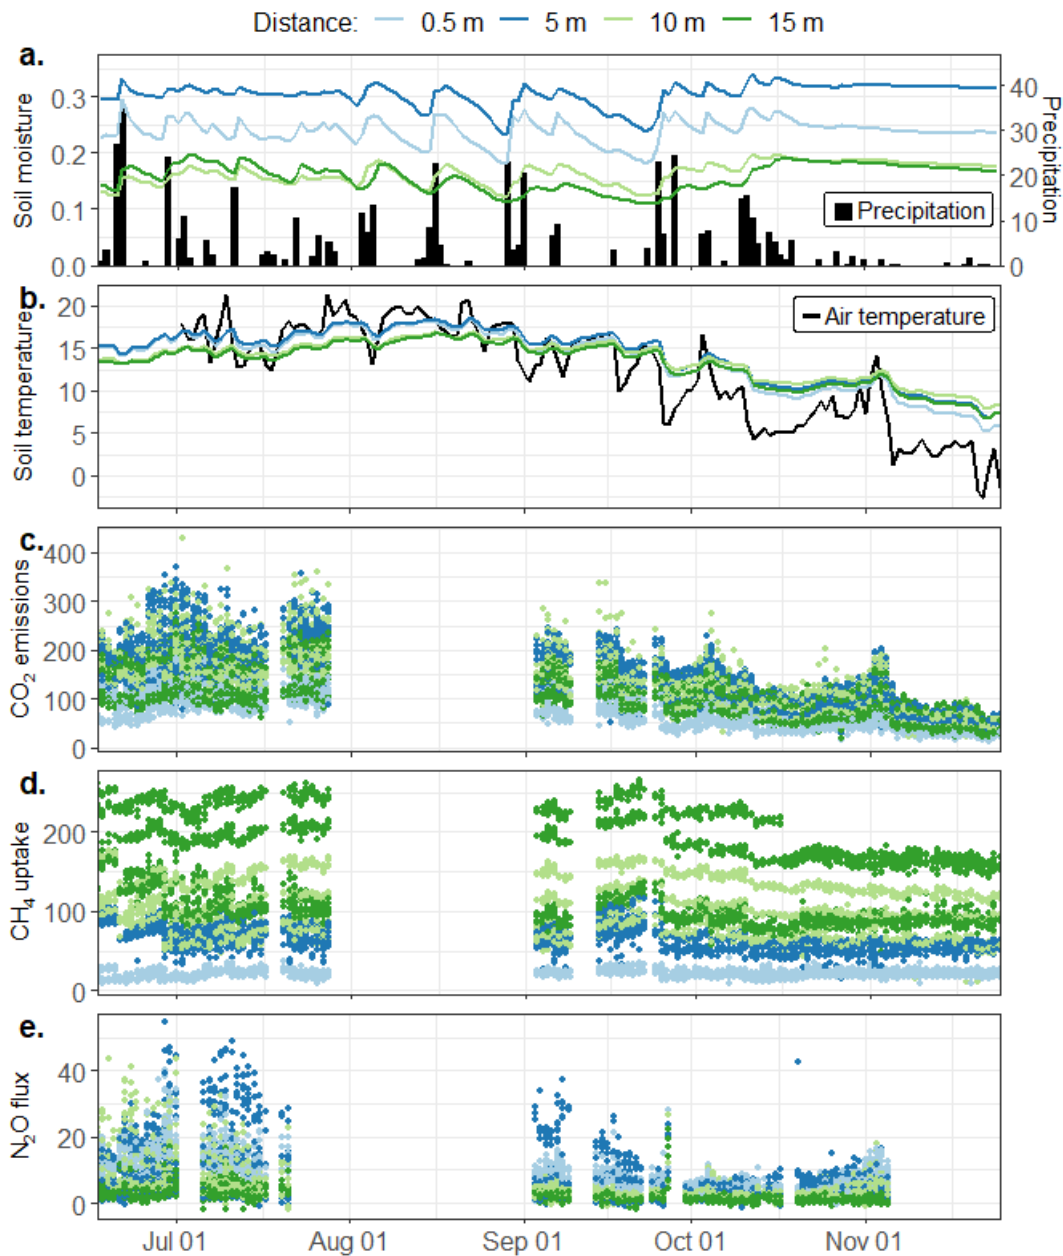

34

35 **Figure S3:** Temporal overview of **a.** soil moisture (m<sup>3</sup> m<sup>-3</sup>; coloured lines) and total daily  
 36 precipitation (mm; black bars), **b.** soil temperature (°C; coloured lines) and daily average air  
 37 temperature (°C; black line), **c.** CO<sub>2</sub> emissions (mg CO<sub>2</sub>-C m<sup>-2</sup> h<sup>-1</sup>), **d.** CH<sub>4</sub> uptake  
 38 (μg CH<sub>4</sub>-C m<sup>-2</sup> h<sup>-1</sup>), and **e.** N<sub>2</sub>O fluxes (μg N<sub>2</sub>O-N m<sup>-2</sup> h<sup>-1</sup>) measured in 2020. The colours  
 39 represent the four distances from the stream: light blue = 0.5 m, dark blue = 5 m, light green =  
 40 10 m, and dark green = 15 m. Blue and green colours also represent the flat locations and sloped  
 41 locations, respectively.

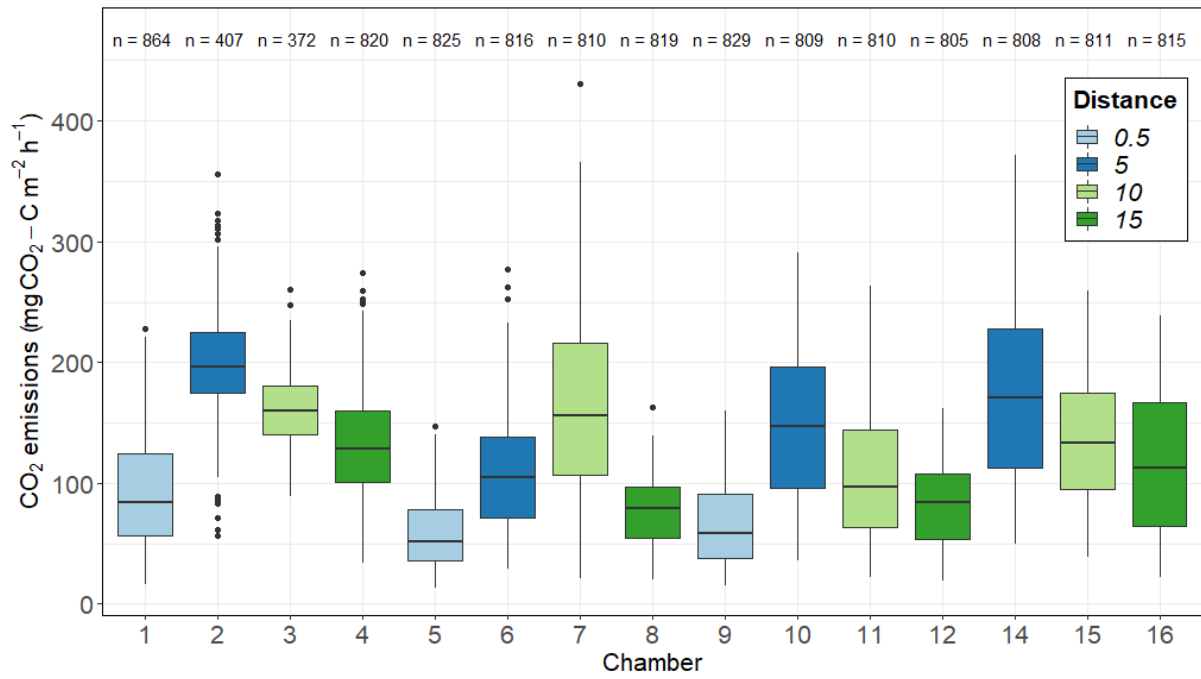

42

43 **Figure S4:** Average CO<sub>2</sub> emission rate (n=11,420) by chamber. Light and dark blue represent  
 44 flat locations (0.5 m and 5 m from the stream), and light and dark green represent mid-slope  
 45 locations (10 m and 15 m from the stream). Numbers above the boxplots indicate the number  
 46 of observations (n).

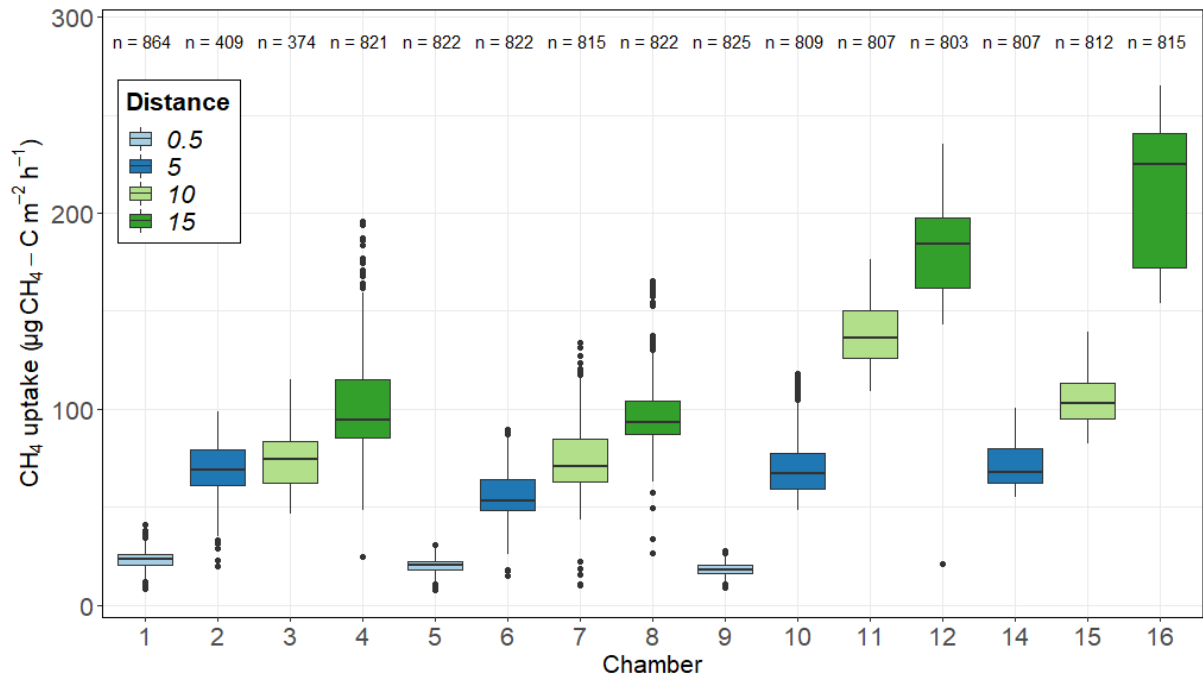

47

48 **Figure S5:** Average CH<sub>4</sub> uptake rates (n=11,427) by chamber. Light and dark blue represent  
 49 flat locations (0.5 m and 5 m from the stream), and light and dark green represent mid-slope  
 50 locations (10 m and 15 m from the stream). Numbers above the boxplots indicate the number  
 51 of observations (n).

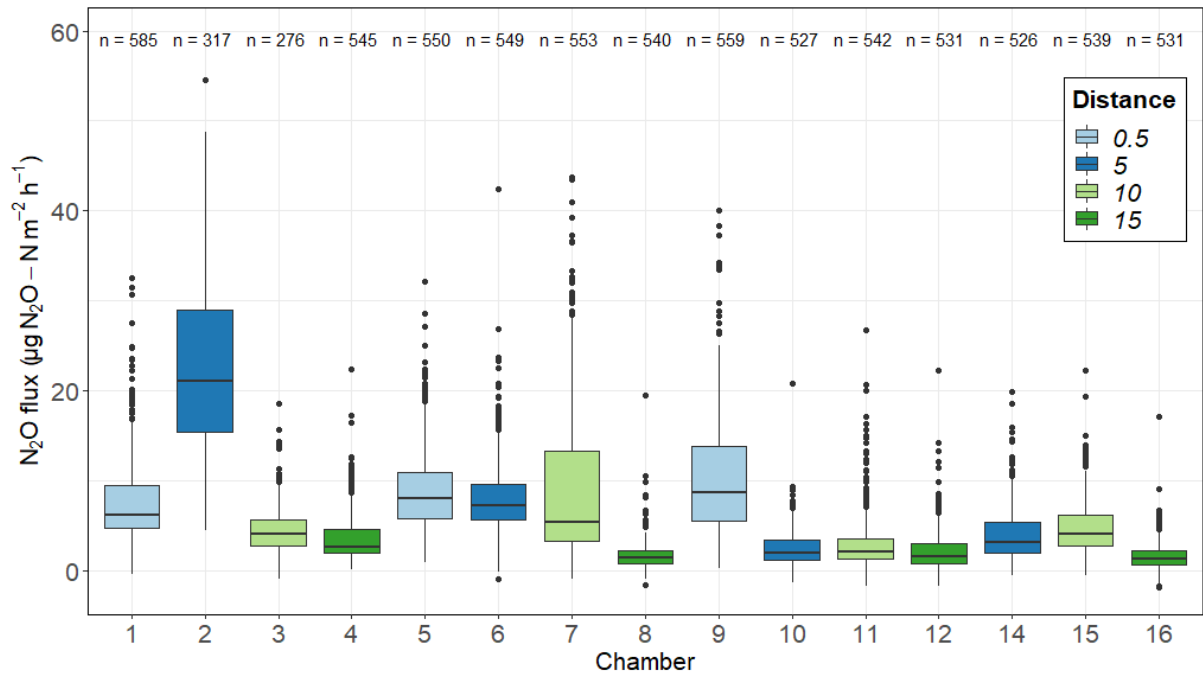

52

53 **Figure S6: Average N<sub>2</sub>O flux rates (n=7,670) by chamber.** Light and dark blue represent flat  
 54 locations (0.5 m and 5 m from the stream), and light and dark green represent mid-slope  
 55 locations (10 m and 15 m from the stream). Numbers above the boxplots indicate the number  
 56 of observations (n).
